# Supplementary material
Source: PubMed Central journal article supplement (PMC4297272)
Supplement: NIHMS636896-supplement-1.pdf [file NIHMS636896-supplement-1.pdf]

## **SUPPLEMENTAL DATA**

### **Supplemental Figure S1. Targeted disruption of AMPK $\alpha$ 1/2 does not affect arsenic-inducible phosphorylation of AKT at Ser473.**

(A) AMPK 1/2 WT and knockout MEFs were serum starved overnight and then treated with As<sub>2</sub>O<sub>3</sub> (5  $\mu$ M) for the indicated times. Total lysates were then subjected to SDS-PAGE and immunoblotted as indicated with antibodies against AMPK $\alpha$  or against GAPDH. (B) AMPK 1/2 WT and knockout MEFs were serum starved overnight and then treated with As<sub>2</sub>O<sub>3</sub> (5  $\mu$ M) for the indicated times. Total lysates were then subjected to SDS-PAGE and immunoblotted as indicated with antibodies against the phosphorylated form of AKT at Ser473 or against AKT or against GAPDH, as indicated. The immunoblots with antibodies against the phosphorylated forms of the proteins or against the total proteins were from lysates from the same experiments analyzed in parallel by SDS-PAGE.

### **Supplemental Figure S2. As- Biotin binds to AMPK $\alpha$ as measured by mass spectroscopy**

(A) Immunoblot of streptavidin pulldowns of AMPK recombinant protein that was sent for mass spectroscopy. (B) Corresponding spectrum and table of matching ions for mass spectroscopy results.

# Supplemental Figure S1

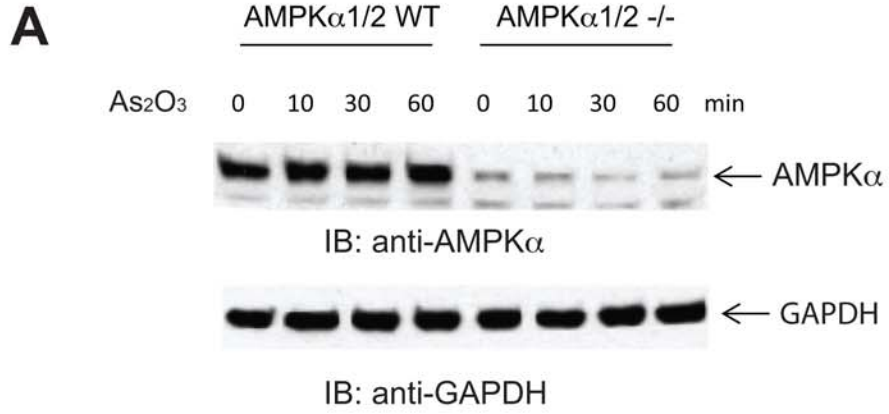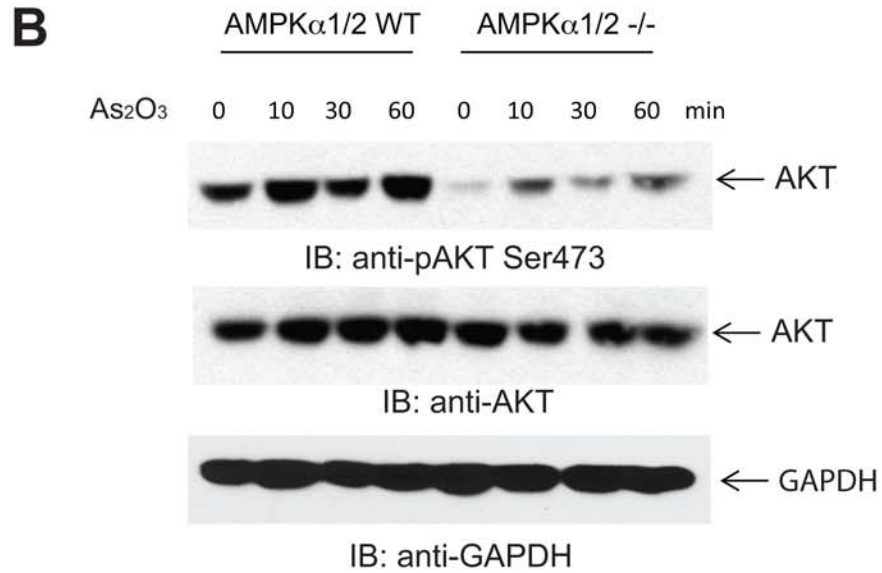

A

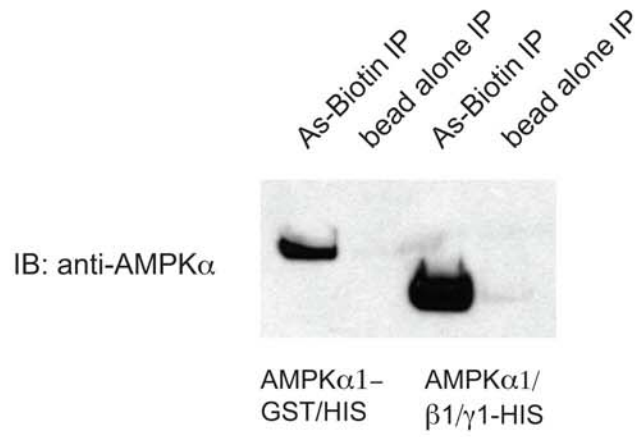

B

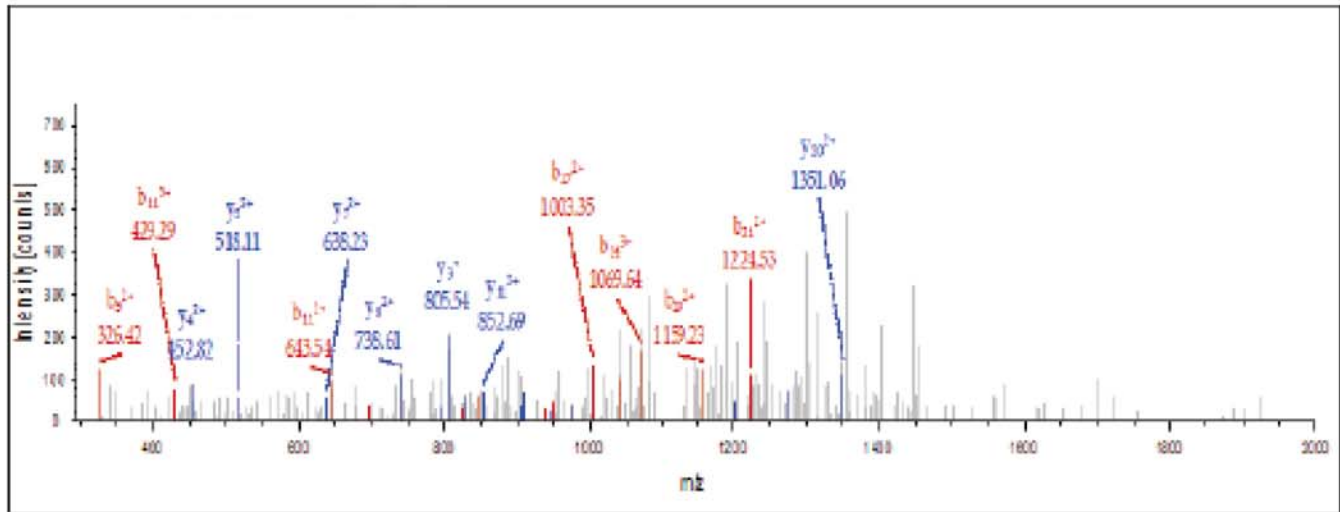

| #1 | b <sup>+</sup> | b <sup>2+</sup> | b <sup>3+</sup> | Seq.             | y <sup>+</sup> | y <sup>2+</sup> | y <sup>3+</sup> | #2 |
|----|----------------|-----------------|-----------------|------------------|----------------|-----------------|-----------------|----|
| 1  | 164.07060      | 82.53894        | 55.36172        | Y                |                |                 |                 | 25 |
| 2  | 277.15467      | 139.08097       | 93.05641        | L                | 3188.59244     | 1594.79986      | 1063.53566      | 24 |
| 3  | 424.22309      | 212.61518       | 142.07921       | F                | 3075.50837     | 1538.25782      | 1025.84097      | 23 |
| 4  | 521.27586      | 261.14157       | 174.43014       | P                | 2928.43995     | 1464.72361      | 976.81817       | 22 |
| 5  | 650.31846      | 325.66287       | 217.44434       | E                | 2831.38718     | 1416.19723      | 944.46724       | 21 |
| 6  | 765.34541      | 383.17634       | 255.78665       | D                | 2702.34458     | 1351.67593      | 901.45304       | 20 |
| 7  | 862.39818      | 431.70273       | 288.13758       | P                | 2587.31763     | 1294.16245      | 863.11073       | 19 |
| 8  | 949.43021      | 475.21874       | 317.14825       | S                | 2490.26486     | 1245.63607      | 830.75980       | 18 |
| 9  | 1112.49353     | 556.75040       | 371.50269       | Y                | 2403.23283     | 1202.12005      | 801.74913       | 17 |
| 10 | 1199.52556     | 600.26642       | 400.51337       | S                | 2240.16951     | 1120.58839      | 747.39469       | 16 |
| 11 | 1286.55759     | 643.78243       | 429.52405       | S                | 2153.13748     | 1077.07238      | 718.38401       | 15 |
| 12 | 1387.60527     | 694.30627       | 463.20661       | T                | 2066.10545     | 1033.55636      | 689.37333       | 14 |
| 13 | 1534.64068     | 767.82398       | 512.21841       | M-Oxidation      | 1965.05777     | 983.03252       | 655.69077       | 13 |
| 14 | 1647.72475     | 824.36601       | 549.91310       | I                | 1818.02235     | 909.51481       | 606.67897       | 12 |
| 15 | 1762.75170     | 881.87949       | 588.25542       | D                | 1704.93828     | 852.97278       | 568.98428       | 11 |
| 16 | 1877.77865     | 939.39296       | 626.59773       | D                | 1589.91133     | 795.45930       | 530.64196       | 10 |
| 17 | 2006.82125     | 1003.91426      | 669.61193       | E                | 1474.88438     | 737.94583       | 492.29964       | 9  |
| 18 | 2077.85837     | 1039.43282      | 693.29097       | A                | 1345.84178     | 673.42453       | 449.28544       | 8  |
| 19 | 2190.94244     | 1095.97486      | 730.98566       | L                | 1274.80466     | 637.90597       | 425.60640       | 7  |
| 20 | 2319.03741     | 1160.02234      | 773.68399       | K                | 1161.72059     | 581.36393       | 387.91171       | 6  |
| 21 | 2448.08001     | 1224.54364      | 816.69819       | E                | 1033.62562     | 517.31645       | 345.21339       | 5  |
| 22 | 2547.14843     | 1274.07785      | 849.72099       | V                | 904.58302      | 452.79515       | 302.19919       | 4  |
| 23 | 3076.50762     | 1538.75745      | 1026.17406      | C-Arsenic biotin | 805.51460      | 403.26094       | 269.17638       | 3  |
| 24 | 3205.55022     | 1603.27875      | 1069.18826      | E                | 276.15541      | 138.58134       | 92.72332        | 2  |
| 25 |                |                 |                 | K                | 147.11281      | 74.06004        | 49.70912        | 1  |
